# Supplementary material for: Investigation of Metabolic Resistance to Soybean Aphid (Aphis glycines Matsumura) Feeding in Soybean Cultivars
Source: MDPI journal article supplement (doi:10.3390/insects13040356), 2022-04-05
Supplement: s1 [file s1]

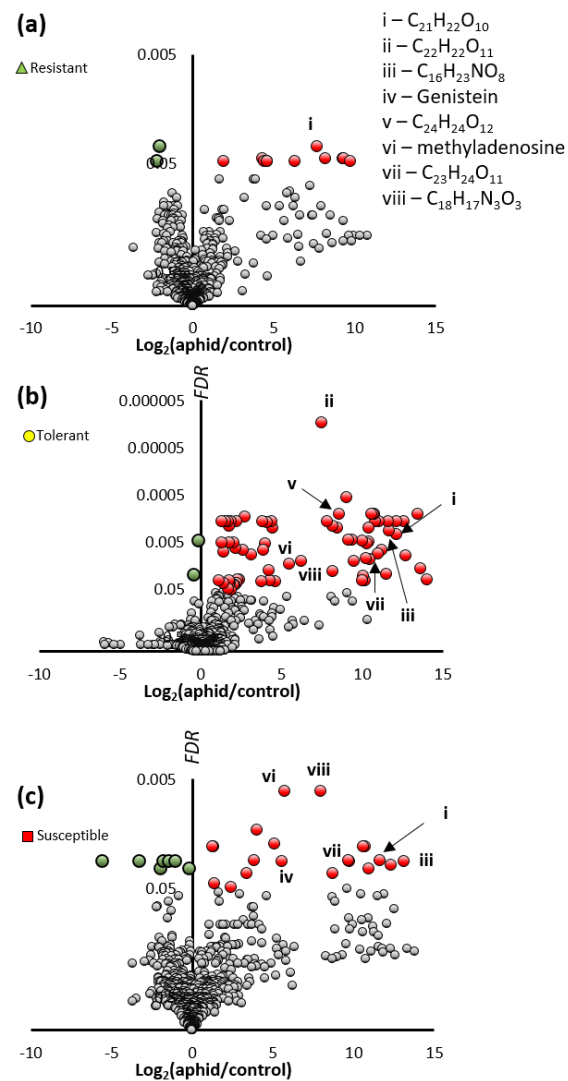

**Figure S1.** Volcano plot analysis of metabolite features of (a) R, (b) T, and (c) S cultivars altered by aphid infestation. Features in green were significantly ( $\text{FDR} < 0.05$ ) decreased upon aphid infestation and features in red were significantly increased by infestation.

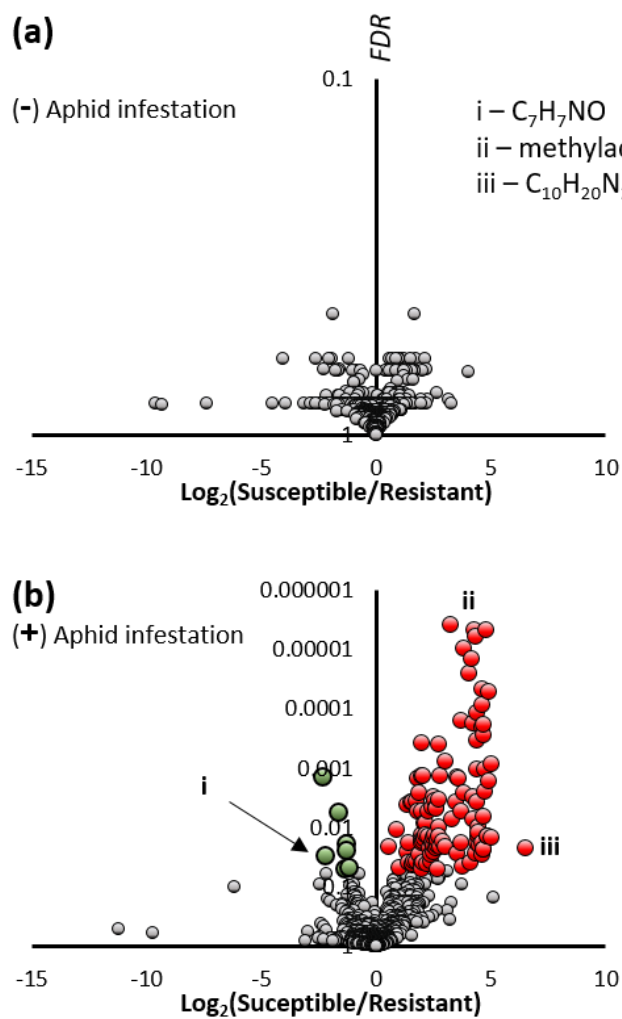

**Figure S2.** Volcano plot analysis of metabolite features of R and S cultivars in the (a) absence of aphid infestation and (b) presence of aphids. Features in green were significantly ( $FDR < 0.05$ ) higher in resistant cultivars and features in red were significantly increased in susceptible cultivars.

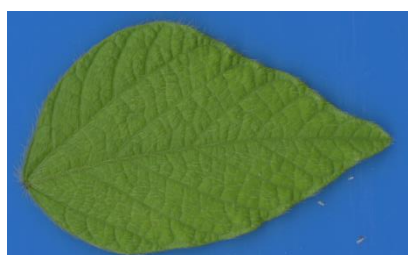

**A**

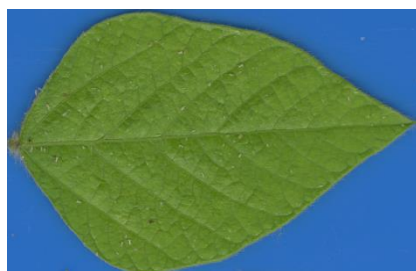

**B**

**Figure S3.** Control (A) and aphid-infested (B) AC Glengarry leaves from trifoliolate 1.

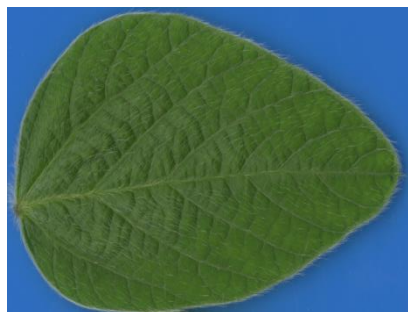

**A**

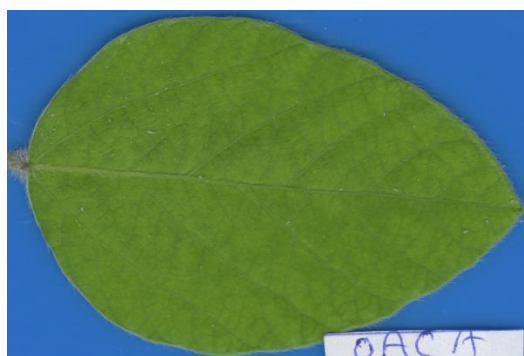

**B**

Figure S4. Control (A) and aphid-infested (B) OAC Avatar leaves from trifoliolate 1.
